# Supplementary figures and images for: DOX-loaded pH-sensitive mesoporous silica nanoparticles coated with PDA and PEG induce pro-death autophagy in breast cancer
Source: Royal Society of Chemistry journal article supplement (doi:10.1039/c7ra05135b), 2017-01-01

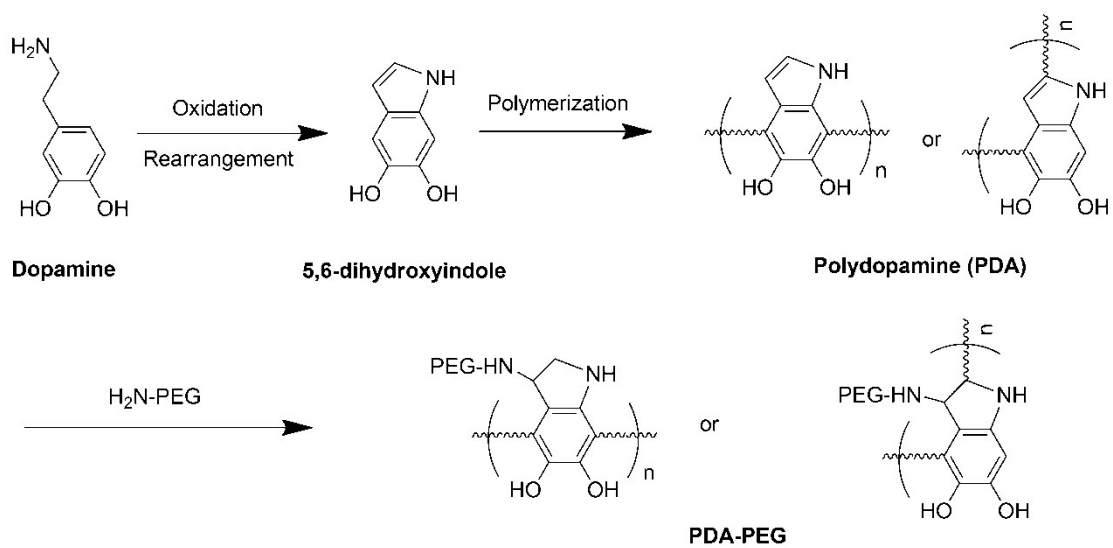

Supplement: c7ra05135b1.pdf [file c7ra05135b1.pdf]
